# Supplementary material for: S. pombe wtf drivers use dual transcriptional regulation and selective protein exclusion from spores to cause meiotic drive
Source: PLoS Genet. 2022 Dec 7;18(12):e1009847. doi: 10.1371/journal.pgen.1009847 (PMC9762604; doi:10.1371/journal.pgen.1009847)
Supplement: S3 Table — Column 1 is the name of oligo used. Column 2 details the sequence of the oligo, while column 3 gives a short description. (XLSX) [file pgen.1009847.s013.xlsx]

## Sheet: Table 1
	oligos used
	oligo	sequence	description
	34	GAAGCTTAGCTACAAATCCCACTGGC	Forward, to amplify ura4+
	37	CGGTTCAAACTCCCTCTCAGCG	Reverse, to amplify ura4+
	604	CTGAATATGGAGGCAATGTGCTCTCATC	Reverse, in the first exon of wtf4
	605	ATGAAGAATAAAGATTATCCCTTGAGGTCGTCTATGG	Forward, at start of wtf4
	634	AATATAGAGCTCCGGGGACGAGGCAAGCTAAAC	SacI tail, Reverse, amplifies ADH1 terminator
	620	AATATAGGAGCTCAGAAATTCAGTGTCATGTCAGCTAC GCAG	SacI tail, Forward, amplifies wtf4 with endogenous promoter (with LTR)
	679	GTATCTGAGGATTCAAGTACAGGACCTACAG	Forward, in exon 2 of wtf4
	687	AATATAGGAGCTCCTGCGTAGCTTACATGTTATTGCGA TAACATTTCG	SacI tail, Reverse, downstream of wtf4
	688	AATATAGGAGCTC GGAAAGCTAAGTTGGGGTGAATAAAAAGGGC	SacI tail, Forward, amplifies wtf4 with endogenous promoter (without LTR)
	701	GTGTATATCATTCAATAATAGATTGTTTTTAAGAATAGA AGAATAAAGATTATCCC	Reverse, Amplifies 5' end of wtf4 with the first antidote start site mutated to TAG
	702	GGGATAATCTTTATTCTTCTATTCTTAAAAACAATCTAT TATTGAATGATATACAC	Forward, Amplifies wtf4 with the first antidote start site mutated to TAG
	718	CCAACGGGTTTACACAAACCCATG	Reverse, in exon 2 of wtf4
	735	CCAAATTTCAAAAGTTATTTATTTTATTATACCTTTCAG AAATTTGGAAATATATTAAAACTGTATCTGAAG	Forward, to mutate 2nd predicted start codon in exon 1 of wtf4
	736	CTTCAGATACAGTTTTAATATATTTCCAAATTTCTGAAA GGTATAATAAAATAAATAACTTTTGAAATTTGG	Reverse, to mutate 2nd predicted start codon in exon 1 of wtf4
	795	AAATGGAATGCCCATCCTGATCTTAACTTG	Forward, to amplify 1kb upstream of his5
	796	TCCCTACAACCTGTTTTTCGCTCATCGTGATGCAAAAC TACTCTTTTCAATTAGA	Reverse, to amplify upstream region of his5 and add ade6 tail
	797	AAAGTTGGTTGGAAAAATTATTCTGCATAGAGATGAATT GGATTATGTCAGGAAAAGAAC	Forward, to amplify downstream region of his5 and add ade6 tail
	798	GTGAACGATTAGGGACGAATTATCAACTGT	Reverse, to amplify 1kb downstream region of his5
	799	TCTAATTGAAAAGAGTAGTTTTGCATCACGATGAGCGA AAAACAGGTTGTAGGGA	Forward, to amplify ade6 and add his5 tail
	800	GTTCTTTTCCTGACATAATCCAATTCATCTCTATGCAG AATAATTTTTCCAACCAACTTT	Reverse, to amplify ade6 and add his5 tail
	861	GCCCTGTTAGACGAATTTATGCTCGTAATATGTC	Reverse, in intron 1 of wtf4
	862	GGTCCTCTCCCAGAATACAATTCAGAAG	Forward, in intron 1 of wtf4
	997	CCCAAGGGAATGTCATTATTATCGTTGGC	Reverse, in exon 6 of wtf4
	998	GCCAACGATAATAATGACATTCCCTTGGG	Forward, in exon 6 of wtf4
	1136	GTTAAATTAAACCAGCACCGTCACCCTGAATATGGAGG CAATGTGCTCTCATC	Reverse, to amplify wtf4 exon 1 with linker tail
	1137	GATGAGAGCACATTGCCTCCATATTCAGGGTGACGGT GCTGGTTTAATTTAAC	Reverse compliment of oligo 1136
	1174	AATATAGGAGCTCGTAAGTGTTGTGTTGTTGATGGATA AGATAA	SacI tail, forward, start of intron 1 of wtf4
	1175	AAGTTATTTATTTTATTAATGCTTTCAGATGAAGAATAAA GATTATCCCTTGAGG	Intron1 tail, forward, start of exon1 of wtf4
	1176	CCTCAAGGGATAATCTTTATTCTTCATCTGAAAGCATT AATAAAATAAATAACTT	Reverse compliment of oligo 1175
	1383	GTTTTAATATATTTCCAAATTTCTGAAAGCATTTCTTAA AAACAATCTATTATTGAATG	Reverse, to amplify antidote promoter and add poison tail
	1384	CATTCAATAATAGATTGTTTTTAAGAAATGCTTTCAGAA ATTTGGAAATATATTAAAAC	Reverse compliment of oligo 1383
	1447	GAAATTCGCTTATTTAGAAGTGGCGCGCCTTACTTGTA CAGCTCGTCCATGCCGCCGGTG	Forward, to amplify ADH1 terminator
	1448	CACCGGCGGCATGGACGAGCTGTACAAGTAAGGCGC GCCACTTCTAAATAAGCGAATTTC	Reverse compliment of 1447
	1548	CAAAAGTTATTTATTTTATTAATGCTTTCAGATGTCTAA AGGTGAAGAATTATTCACTG	Forward, in GFP, with intron1 tail
	1549	CAGTGAATAATTCTTCACCTTTAGACATCTGAAAGCAT TAATAAAATAAATAACTTTTG	Reverse compliment of oligo 1548
	3024	TTAAAGCGATTGGAATTGGACTACAGAGTGAATATTCT TGATTTCGCTGTTTCGTTTGTCGCAATCACAGCAATTG AACTATTTGTGTGTATATCATTCAATAATAGATTGTTTT TAAGAAATGAAGAATAAAGATTATCCCTTGAGGTCGTC TATGGTGAGCAAGGGCGAGGAGGATAACATGGCCATC ATCAAGGAGT	Forward, to generate the longer antidote promoter
	3025	AATATAGGAGCTCCTCTGTAGTCCAATTCCAATCGCTT TAAAGACTTTTTAACAAAATAATAAAATTGTTCAAACAAA TTTCCAACTAATTCCTTCAAACAATGGCATAAAAAAAGA AGAACGAAAAAACTGAACGAGGCAGTGAATTGCTTCTG ACACATTTATTTTGTCACTGCCCTTTTTATTCACCCCA ACTTAGCTTTCC	reverse, to generate the longer antidote promoter
